# Supplementary material for: Efficacy and Tolerability of Exenatide Once Weekly Over 6 Years in Patients with Type 2 Diabetes: An Uncontrolled Open-Label Extension of the DURATION-1 Study
Source: PubMed Central journal article supplement — Diabetes Technol Ther. 2016 Nov 1;18(11):677–86. doi: 10.1089/dia.2016.0107 (PMC5124747; doi:10.1089/dia.2016.0107), 2016-11-01

**Figure S1.** Secondary analysis of HbA1c changes in all 6-year completers ( $n = 136$ ) and those not on additional glucose-lowering medications ( $n = 78$ ). LSM  $\pm$  SE changes from baseline in HbA1c by ANCOVA. \* $P < 0.05$  for change from baseline. ANCOVA, analysis of covariance; HbA1c, glycated hemoglobin; LSM, least-squares mean; SE, standard error.

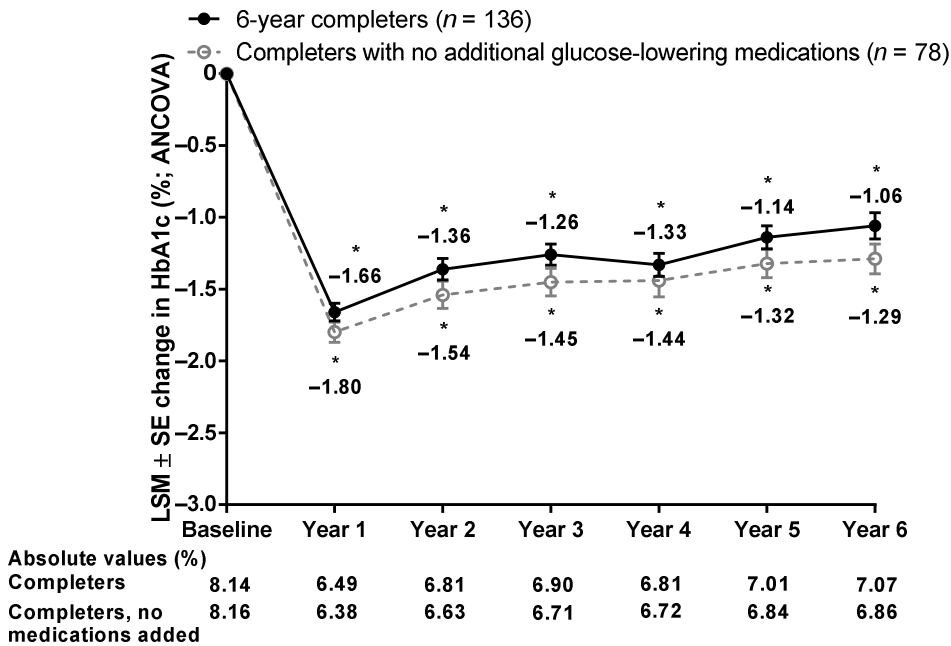

Supplement: Supp_Figure1.pdf [file Supp_Figure1.pdf]
