# Supplementary material for: Efficacy and Tolerability of Exenatide Once Weekly Over 6 Years in Patients with Type 2 Diabetes: An Uncontrolled Open-Label Extension of the DURATION-1 Study
Source: PubMed Central journal article supplement — Diabetes Technol Ther. 2016 Nov 1;18(11):677–86. doi: 10.1089/dia.2016.0107 (PMC5124747; doi:10.1089/dia.2016.0107), 2016-11-01

**Figure S2.** Time course of nausea and hypoglycemia adverse events. Incidence of (A) nausea and (B) hypoglycemia (by use of concomitant SU agents at screening) in the intent-to-treat population. \*One patient on concomitant insulin; †Two patients on concomitant insulin. SU, sulfonylurea.

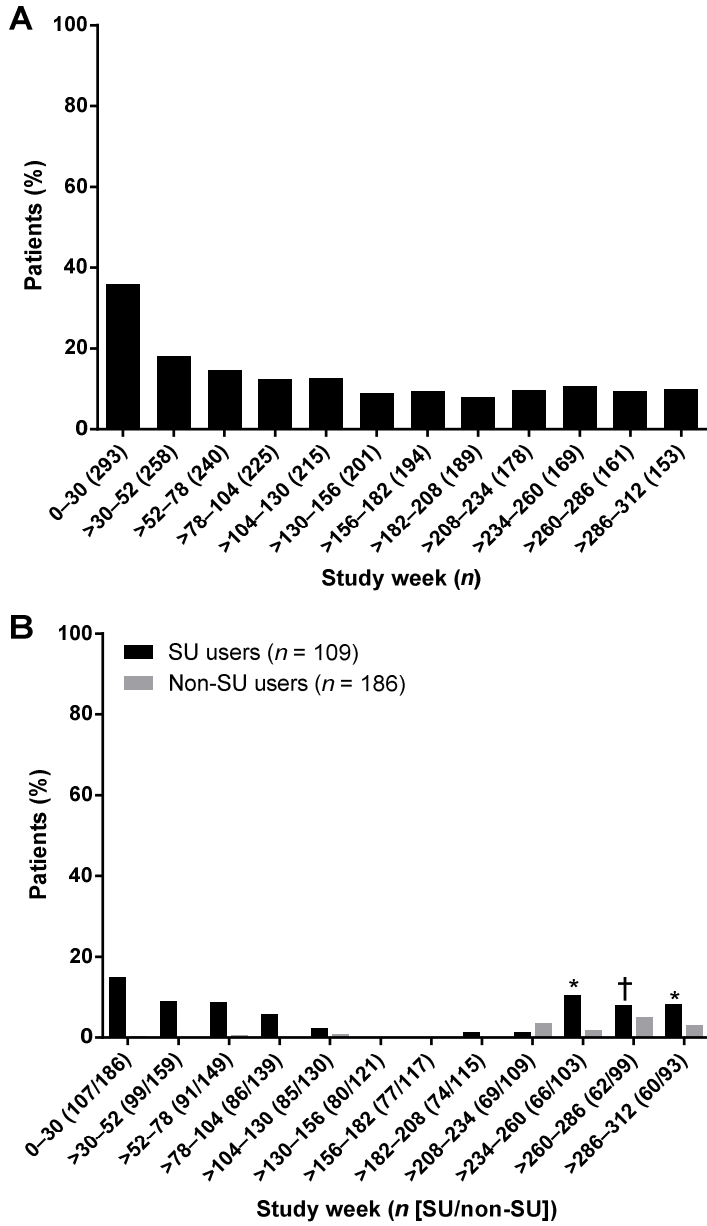

Supplement: Supp_Figure2.pdf [file Supp_Figure2.pdf]
