# Supplementary material for: Efficacy and Tolerability of Exenatide Once Weekly Over 6 Years in Patients with Type 2 Diabetes: An Uncontrolled Open-Label Extension of the DURATION-1 Study
Source: PubMed Central journal article supplement — Diabetes Technol Ther. 2016 Nov 1;18(11):677–86. doi: 10.1089/dia.2016.0107 (PMC5124747; doi:10.1089/dia.2016.0107), 2016-11-01
Supplement: Supp_Table1.pdf [file Supp_Table1.pdf]

## Supporting Information

**TABLE S1.** CHANGES OVER TIME RELATIVE TO BASELINE IN METABOLIC AND CARDIOVASCULAR BIOMARKERS IN THE 6-YEAR COMPLETER

POPULATION ( $N = 136$ )

| Parameter                                                          | Baseline             | Year 1                     | Year 2                     | Year 3                     | Year 4                     | Year 5                     | Year 6                     |
|--------------------------------------------------------------------|----------------------|----------------------------|----------------------------|----------------------------|----------------------------|----------------------------|----------------------------|
| HOMA-B (ratio of endpoint to baseline),<br>geometric LSM (95% CI)* | 52.6 ± 2.8           | 1.78<br>(1.61, 1.96)       | 1.73<br>(1.55, 1.94)       | 1.60<br>(1.43, 1.79)       | 1.57<br>(1.38, 1.78)       | 1.22<br>(1.08, 1.39)       | 1.21<br>(1.05, 1.39)       |
| HOMA-S (ratio of endpoint to baseline),<br>geometric LSM (95% CI)* | 43.4 ± 2.1           | 1.14<br>(1.02, 1.27)       | 1.13<br>(1.01, 1.26)       | 1.12<br>(1.00, 1.26)       | 1.19<br>(1.06, 1.34)       | 1.38<br>1.21, 1.57         | 1.28<br>(1.13, 1.46)       |
| Total cholesterol, mg/dL, LSM (95% CI) <sup>†</sup>                | 170.0 ± 3.7          | -9.3<br>(-14.9, -3.7)      | -6.3<br>(-13.3, +0.8)      | -7.9<br>(-14.8, -1.0)      | -9.3<br>(-15.9, -2.8)      | -9.9<br>(-16.4, -3.4)      | -10.1<br>(-17.0, -3.1)     |
| LDL cholesterol, mg/dL, LSM (95% CI) <sup>†</sup>                  | 90.7 ± 3.2           | -3.7<br>(-8.2, +0.7)       | -2.7<br>(-8.4, +3.0)       | -5.9<br>(-12.0, +0.2)      | -7.7<br>(-13.2, -2.3)      | -8.5<br>(-13.9, -3.1)      | -9.8<br>(-15.6, -4.0)      |
| HDL cholesterol, mg/dL, LSM (95% CI) <sup>†</sup>                  | 45.3 ± 0.9           | -0.8<br>(-2.2, +0.7)       | +1.5<br>(-0.4, +3.4)       | +2.2<br>(+0.6, +3.8)       | +2.0<br>(+0.3, +3.7)       | +3.0<br>(+1.1, +4.8)       | +2.6<br>(+0.7, +4.5)       |
| LDL/HDL cholesterol ratio, median (range)                          | 1.95<br>(0.58, 6.16) | -0.07<br>(-3.00,<br>+2.30) | -0.05<br>(-3.33,<br>+1.79) | -0.19<br>(-2.62,<br>+3.50) | -0.26<br>(-3.78,<br>+2.32) | -0.20<br>(-2.16,<br>+2.49) | -0.22<br>(-2.10,<br>+3.35) |
| Triglycerides, mg/dL, median (range)                               | 151.0                | -15.0                      | -22.0                      | -14.0                      | -9.0                       | -11.0                      | -8.0                       |

| Parameter                               | Baseline     | Year 1        | Year 2       | Year 3        | Year 4        | Year 5       | Year 6        |
|-----------------------------------------|--------------|---------------|--------------|---------------|---------------|--------------|---------------|
|                                         | (35, 674)    | (-369, +216)  | (-486, +165) | (-356, 196)   | (-418, +193)  | (-363, +324) | (-307, +431)  |
| SBP, mmHg                               |              |               |              |               |               |              |               |
| All completers, mean ± SD               | 128.4 ± 13.7 | -4.8 ± 14.1   | -3.6 ± 15.4  | -0.7 ± 14.2   | -0.2 ± 17.0   | +0.7 ± 17.5  | +1.7 ± 18.1   |
| Completers with baseline SBP ≥130 mmHg  | 139.6 ± 1.25 | -7.3          | -5.3         | -6.9          | -11.3         | -5.6         | -9.9          |
| (n = 64), LSM (95% CI) <sup>†</sup>     |              | (-11.9, -2.8) | (-9.9, -0.7) | (-12.8, -1.0) | (-17.0, -5.6) | (-11.3, 0.0) | (-15.4, -4.4) |
| DBP, mmHg                               |              |               |              |               |               |              |               |
| All completers, mean ± SD               | 77.9 ± 8.5   | -1.8 ± 8.3    | -0.6 ± 8.3   | -1.3 ± 9.2    | -1.6 ± 9.8    | -1.6 ± 9.2   | -1.2 ± 9.5    |
| Completers with baseline DBP ≥130 mmHg, | 81.2 ± 1.0   | -4.2          | -1.3         | -4.1          | -6.6          | -5.6         | -5.8          |
| LSM (95% CI) <sup>†</sup>               |              | (-7.1, -1.3)  | (-4.5, +1.8) | (-7.6, -0.7)  | (-9.8, -3.4)  | (-8.8, -2.4) | (-9.1, -2.4)  |
| Heart rate, bpm, mean ± SD              | 73.1 ± 9.0   | +3.1 ± 10.5   | +3.4 ± 9.3   | +2.1 ± 11.5   | +1.6 ± 10.5   | +1.9 ± 9.5   | +2.1 ± 9.6    |

bpm, beats per minute; CI, confidence interval; DBP, diastolic blood pressure; HDL, high-density lipoprotein; HOMA-B, homeostasis model assessment of  $\beta$ -cell function; HOMA-S, homeostasis model assessment of insulin sensitivity; LDL, low-density lipoprotein; LSM, least-squares mean; SBP, systolic blood pressure; SD, standard deviation.

\*Baseline values are reported as geometric mean ± standard error in units of percent. <sup>†</sup>Baseline values are reported as mean ± standard error.
