# Supplementary material for: Efficacy and Tolerability of Exenatide Once Weekly Over 6 Years in Patients with Type 2 Diabetes: An Uncontrolled Open-Label Extension of the DURATION-1 Study
Source: PubMed Central journal article supplement — Diabetes Technol Ther. 2016 Nov 1;18(11):677–86. doi: 10.1089/dia.2016.0107 (PMC5124747; doi:10.1089/dia.2016.0107), 2016-11-01
Supplement: Supp_Table2.pdf [file Supp_Table2.pdf]

**Table S2. SERIOUS ADVERSE EVENTS REPORTED IN >1 PATIENT IN THE INTENT-TO-TREAT**POPULATION OCCURRING DURING THE OPEN-ENDED ASSESSMENT PERIOD ( $N = 258$ )

| <b>Event</b>                | <b>n (%)</b> |
|-----------------------------|--------------|
| Acute myocardial infarction | 3 (1.2)      |
| Arrhythmia                  | 2 (0.8)      |
| Arthralgia                  | 2 (0.8)      |
| Arthritis                   | 2 (0.8)      |
| Atrial fibrillation         | 3 (1.2)      |
| Bladder cancer              | 2 (0.8)      |
| Chest pain                  | 2 (0.8)      |
| Cholecystitis               | 3 (1.2)      |
| Cholelithiasis              | 2 (0.8)      |
| Congestive cardiac failure  | 2 (0.8)      |
| Coronary artery disease     | 4 (1.6)      |
| Hypertension                | 2 (0.8)      |
| Myocardial infarction       | 2 (0.8)      |
| Non-cardiac chest pain      | 2 (0.8)      |
| Osteoarthritis              | 5 (1.9)      |
| Perirectal abscess          | 2 (0.8)      |
| Pyelonephritis              | 2 (0.8)      |
| Urinary tract infection     | 2 (0.8)      |
